## Short Communication

# The time–temperature relationship for the inactivation of *Ascaris* eggs

D. Naidoo and G. L. Foutch

### ABSTRACT

A time–temperature plot presenting the inactivation of *Ascaris* eggs is expanded with additional literature data. The information is of value to designers and operators of sanitation equipment who have *Ascaris* inactivation as an objective.

**Key words** | *Ascaris* sp., exposure time, inactivation, temperature, viscous heating

#### D. Naidoo

School of Life Sciences, Westville Campus,  
University of KwaZulu-Natal,  
Durban 4051,  
South Africa

#### G. L. Foutch (corresponding author)

School of Computing and Engineering,  
University of Missouri-Kansas City,  
Kansas City, MO 64110,  
USA  
and  
Chemical Engineering, Howard Campus,  
University of KwaZulu-Natal,  
Durban 4001,  
South Africa  
E-mail: [foutch@okstate.edu](mailto:foutch@okstate.edu)

### INTRODUCTION

Lack of improved water, sanitation and hygiene (WASH) is associated with the infectious diseases that burden approximately one-third of the world's population (Bardosh 2015). Access to WASH results in diarrhoeal disease prevalence, which manifests as a symptom of bacterial, viral and helminth infections – for the latter, the most common being *Ascaris* sp. (Fewtrell *et al.* 2005; Brownell & Nelson 2006).

Temperature is the most effective treatment option for sanitising human excreta and waste streams containing faeces (faecal sludge). Previous studies indicate that above 60°C *Ascaris* eggs are inactivated within a few minutes, but may survive more than a year at 40°C (Brownell & Nelson 2006). Viscous heating (VH) technology achieves high temperature quickly when a thick fluid passes through a narrow gap between a double cylinder with a stationary outer shell and a rotating inner cylinder (Belcher *et al.*

2015). The resulting shear field generates heat by molecular friction and inactivates *Ascaris* sp. eggs in faecal sludge (Podichetty *et al.* 2014). A key design variable of VH is the faecal sludge residence time at a specific operating temperature. Defining an effluent target temperature is an outcome of this communication. Previous studies, using both simulated and screened (sieved to remove debris) VIP (ventilated improved pit) latrine sludge, indicate that elevated temperatures (up to 95°C at atmospheric pressure) are achieved at low VH residence time (seconds) while deactivating helminth eggs (Belcher *et al.* 2015). Ensuring *Ascaris* is deactivated within this brief time is essential, and recent work (Naidoo 2017) defines high-temperature, low-exposure-time inactivation of *Ascaris*.

### SUMMARY OF THE EXISTING STUDY

Details of the experimental procedure and presentation of results can be found elsewhere (Naidoo 2017). Methodology is summarized briefly here. *Ascaris suum* eggs were procured

This is an Open Access article distributed under the terms of the Creative Commons Attribution Licence (CC BY 4.0), which permits copying, adaptation and redistribution, provided the original work is properly cited (<http://creativecommons.org/licenses/by/4.0/>).

doi: 10.2166/washdev.2017.102

and exposed to 60°C, 65°C, 70°C, 75°C and 80°C for 5, 10, 15, 30 and 45 seconds, and 1, 2, 3 and 4 minutes, respective to each temperature. Eggs were pipetted into plastic test tubes containing water, which had been preheated to the test temperature. Two samples (triplicated) were treated at each temperature/time combination and processed by either i) washing directly onto a 20 µm sieve (placed in a bowl containing tap water to allow for rapid cooling to room temperature), or ii) transferred into a beaker containing iced water (to allow for rapid cooling) and then washed onto the sieve. Eggs were immediately analysed via light microscopy, washed back into the test tube, and incubated for 28 days to determine whether further development occurred.

At 4-second exposure time, treatment at 80°C was sufficient, with <11% viable eggs recovered pre-incubation and <1% viable eggs recovered post-incubation. Eggs that appeared undeveloped but globular (indicating some form

of morphological damage) did not develop further during incubation, indicating successful inactivation. Lower temperatures required longer exposure times (for example, treatment at 60°C required 3 or more minutes for visible damage), and from a visual examination of egg morphology the die-off mechanism appeared different.

## COMPARISON WITH LITERATURE DATA

The time versus temperature plot of Thomas *et al.* (2015) presents comparative *Ascaris* inactivation data. An updated literature review found additional data for the Thomas *et al.* figure, as discussed below. The revised Figure 1 also includes data from Naidoo (2017) that extends the time–temperature range. References that cite inactivation as 99 + % are included. Experimental methods

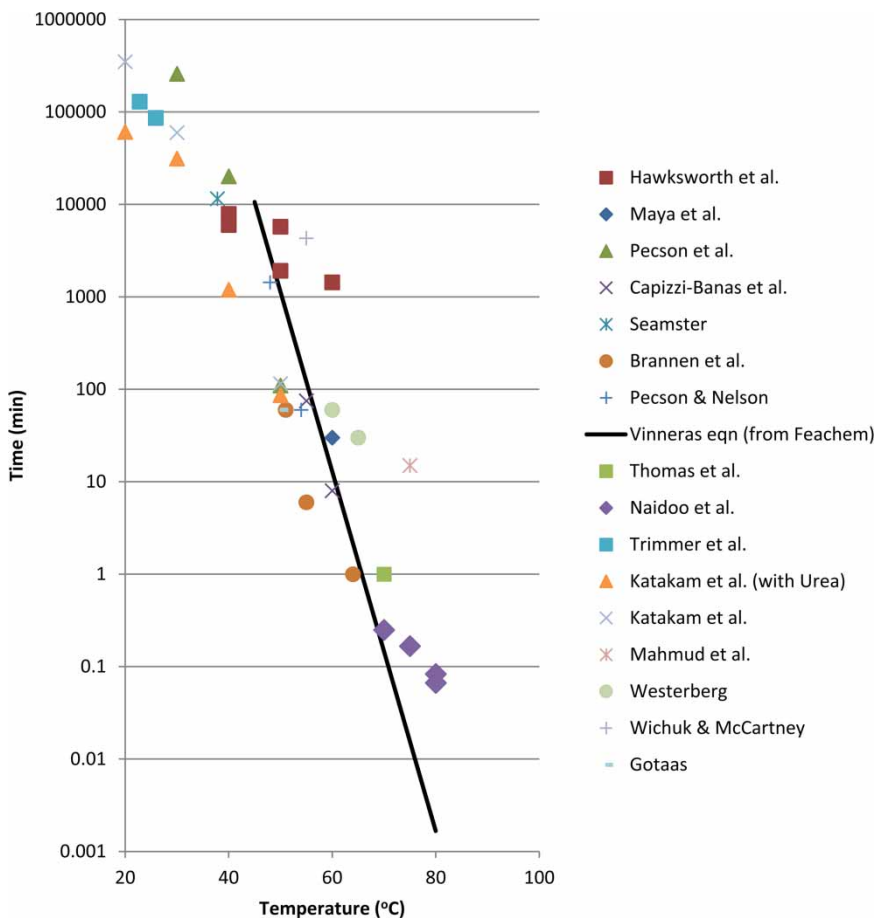

Figure 1 | Comparison of time versus temperature inactivation data for *Ascaris* sp.

vary among the cited papers; a detailed comparative review is not presented.

Temperature is the focus of this data analysis, whether or not VH is used to generate the heat. Cited studies may include factors such as moisture content, alkaline concentration, pH and anaerobic operating conditions, but these are considered secondary influences and are not differentiated within the plot. The line in Figure 1 is that of Vinnerås *et al.* (2003) based on the data of Feachem *et al.* (1983). Their correlation begins at 45°C and does not extrapolate lower.

Data included are briefly discussed. Maya *et al.* (2012) concluded that times for both *A. lumbricoides* and *A. suum* showed negligible differences; as a result, Figure 1 includes both. Low temperature data of Kim *et al.* (2012), Berggren *et al.* (2004), Trimmer *et al.* (2016), Katakam *et al.* (2014) and Seamster (1950) are included in the plot. The latter considers the effects of chemical agents, and relative humidity (RH). Other researchers considered variables in addition to temperature: Hawksworth *et al.* (2010) included RH. Pecson *et al.* (2007) included pH. Capizzi-Banas *et al.* (2004) looked at lime and quick lime concentrations. Pecson & Nelson (2003) included pH and ammonia concentrations. Brannen *et al.* (1975) presented higher temperature data that included compost, water and faecal sludge with heat and/or radiation.

In examining the plot, the trend appears consistent with the Vinnerås *et al.* (2003) equation. A factor contributing to variability is that time scales may be overstated. For example, at high temperatures the Vinnerås *et al.* equation predicts inactivation of 0.1 sec at 80°C, while controlling exposure time in the laboratory is challenging at 1.0 sec. Below 45°C a new relationship may be appropriate.

Several studies are informative for practitioners but not presented in Figure 1 because complete inactivation was not reported. Vu-Van *et al.* (2016) monitored *A. lumbricoides* egg die-off over 181 days with average temperatures from 19 to 32°C and variables such as lime, rice husks and aeration. Berendes *et al.* (2015) studied inactivation at locations within pits with wide temperature and moisture content ranges. Fidjeland *et al.* (2015) developed an inactivation expression as a function of temperature and ammonia concentration up to 33°C. Yaya-Beas *et al.* (2016) presented inactivation percentages for an upflow anaerobic sludge

blanket reactor operating at low temperatures. Manser *et al.* (2015) discussed inactivation near 35°C during anaerobic digestion and presented an inactivation model subsequently (Manser *et al.* 2016). Some data were omitted because the authors mentioned uncertainty or variability within the data (Brandon 1978; Steer & Windt 1978; Aitken *et al.* 2005; Papat *et al.* 2010).

## CONCLUSION

Based on data from the current study, 4–5 seconds of exposure at 80°C appears sufficient to inactivate *Ascaris* eggs. At 75°C and 70°C treatment may also be effective, but exposure time should be increased to achieve the same level of inactivation.

## REFERENCES

- Aitken, M. D., Sobsey, M. D., Blauth, K. E., Shehee, M., Crunk, P. L. & Walters, G. W. 2005 Inactivation of *Ascaris suum* and poliovirus in biosolids under thermophilic anaerobic digestion conditions. *Environmental Science & Technology* **39** (15), 5804–5809.
- Bardosh, K. 2015 Achieving ‘total sanitation’ in rural African geographies: poverty, participation and pit latrines in Eastern Zambia. *Geoforum* **66**, 53–63.
- Belcher, D., Foutch, G. L., Smay, J., Archer, C. & Buckley, C. A. 2015 Viscous heating effect on deactivation of helminth eggs in ventilated improved pit sludge. *Water, Science & Technology* **72** (7), 1119–1126.
- Berendes, D., Levy, K., Knee, J., Handzel, T. & Hill, V. R. 2015 *Ascaris* and *Escherichia coli* inactivation in an ecological sanitation system in Port-au-Prince, Haiti. *PLoS One* **10** (5), e0125336.
- Berggren, I., Albihn, A. & Johansson, M. 2004 The effect of temperature on the survival of pathogenic bacteria and *Ascaris suum* in stored sewage sludge. *Proc. Ramiran* 53–56.
- Brandon, J. R. 1978 *Parasites in Soil/Sludge Systems*. Department of Energy, Sandia Laboratories, National Technical Information Service, Springfield, VA.
- Brannen, J. P., Garst, D. M. & Langley, S. 1975 *Inactivation of Ascaris lumbricoides Eggs by Heat, Radiation, and Thermoradiation*. No. SAND-75-0163. Sandia Labs, Albuquerque, NM and Livermore, CA.
- Brownell, S. A. & Nelson, K. 2006 Inactivation of single-celled *Ascaris suum* eggs by low-pressure UV radiation. *Applied Environmental Microbiology* **72** (3), 2178–2184.

- Capizzi-Banas, S., Deloge, M., Remy, M. & Schwartzbrod, J. 2004 [Liming as an advanced treatment for sludge sanitisation: helminth eggs elimination – \*Ascaris\* eggs as model](#). *Water Research* **38** (14), 3251–3258.
- Feachem, R. G., Guy, M. W., Harrison, S., Iwugo, K. O., Marshall, T., Mbere, N., Muller, R. & Wright, A. M. 1983 [Excreta disposal facilities and intestinal parasitism in urban Africa: preliminary studies in Botswana, Ghana and Zambia](#). *Transactions of the Royal Society of Tropical Medicine & Hygiene* **77** (4), 515–521.
- Fewtrell, L., Kaufmann, R. B., Kay, D., Enanoria, W., Haller, L. & Colford, J. M. 2005 [Water, sanitation, and hygiene interventions to reduce diarrhoea in less developed countries: a systematic review and meta-analysis](#). *Lancet Infectious Diseases* **5** (1), 42–52.
- Fidjeland, J., Nordin, A., Pecson, B. M., Nelson, K. L. & Vinnerås, B. 2015 [Modeling the inactivation of \*Ascaris\* eggs as a function of ammonia concentration and temperature](#). *Water Research* **83**, 153–160.
- Gotaas, H. B. 1956 *Composting. Sanitary Disposal and Reclamation of Organic Wastes*. World Health Organization, Geneva, Switzerland.
- Hawksworth, D., Archer, C., Rajcoomar, K., Buckley, C. & Stenström, T. A. 2010 [The effect of temperature and relative humidity on the viability of \*Ascaris\* ova in urine diversion waste](#).
- Katakam, K. K., Mejer, H., Dalsgaard, A., Kyvsgaard, N. C. & Thamsborg, S. M. 2014 [Survival of \*Ascaris suum\* and \*Ascaridia galli\* eggs in liquid manure at different ammonia concentrations and temperatures](#). *Veterinary Parasitology* **204** (3), 249–257.
- Kim, M.-K., Kyoung, H. P., Hwang, Y.-S., Park, K.-H., Hwang, I. G., Chai, J.-Y. & Shin, E.-H. 2012 [Effect of temperature on embryonation of \*Ascaris suum\* eggs in an environmental chamber](#). *Kor. J. Parasitology* **50** (3), 239–242.
- Mahmud, Z. H., Das, P. K., Khanum, H., Hossainey, M. R. H., Islam, E., Mahmud, H. A., Islam, M. S., Imran, K. M., Dey, D. & Islam, M. S. 2016 [Time-temperature model for bacterial and parasitic annihilation from cow dung and human faecal sludge: a forthcoming bio-fertilizer](#). *Journal of Bacteriology Parasitology* **7** (284). doi:10.4172/2155-9597.1000284.
- Manser, N. D., Wald, I., Ergas, S. J., Izurieta, R. & Mihelcic, J. R. 2015 [Assessing the fate of \*Ascaris suum\* ova during mesophilic anaerobic digestion](#). *Environmental Science & Technology* **49** (5), 3128–3135.
- Manser, N. D., Cunningham, J. A., Ergas, S. J. & Mihelcic, J. R. 2016 [Modeling inactivation of highly persistent pathogens in household-scale semi-continuous anaerobic digesters](#). *Environmental Engineering Science* **33** (11), 851–860.
- Maya, C., Torner-Morales, F. J., Lucario, E. S., Hernández, E. & Jiménez, B. 2012 [Viability of six species of larval and non-larval helminth eggs for different conditions of temperature, pH and dryness](#). *Water Research* **46** (15), 4770–4782.
- Naidoo, D. 2017 [Inactivation of \*Ascaris\* Eggs by Exposure to High Temperature for the Purpose of Sanitizing Sludge by Viscous Heating](#). Masters thesis, School of Life Sciences, University of KwaZulu-Natal, Westville Campus, Durban, South Africa.
- Pecson, B. M. & Nelson, K. L. 2003 [The effects of exposure time, temperature, pH, and ammonia concentration on the inactivation rate of \*Ascaris\* eggs](#). *Proceedings of the Water Environment Federation* **10**, 534–539.
- Pecson, B. M., Barrios, J. A., Jiménez, B. E. & Nelson, K. L. 2007 [The effects of temperature, pH, and ammonia concentration on the inactivation of \*Ascaris\* eggs in sewage sludge](#). *Water Research* **41** (13), 2893–2902.
- Podichetty, J. T., Islam, M. W., Van, D., Foutch, G. L. & Johannes, A. H. 2014 [Viscous heating analysis of simulant feces by computational fluid dynamics and experimentation](#). *Journal of Water Sanitation & Hygiene for Development* **4** (1), 62–71.
- Popat, S. C., Yates, M. V. & Deshusses, M. A. 2010 [Kinetics of inactivation of indicator pathogens during thermophilic anaerobic digestion](#). *Water Research* **44** (20), 5965–5972.
- Seamster, A. P. 1950 [Developmental studies concerning the eggs of \*Ascaris lumbricoides\* var. \*suum\*](#). *The American Midland Naturalist Journal* **43** (2), 450–470.
- Steer, A. G. & Windt, C. N. 1978 [Composting and fate of \*Ascaris lumbricoides\* ova](#). *Water SA* **4** (3), 129–132.
- Thomas, J. E., Podichetty, J. T., Shi, Y., Belcher, D., Dunlap, R., McNamara, K., Reichard, M. V., Smay, J., Johannes, A. J. & Foutch, G. L. 2015 [Effect of temperature and shear stress on the viability of \*Ascaris suum\*](#). *Journal of Water Sanitation and Hygiene for Development* **5** (3), 402–411.
- Trimmer, J. T., Nakyanjo, N., Ssekubugu, R., Sklar, M., Mihelcic, J. R. & Ergas, S. J. 2016 [Estimation of \*Ascaris lumbricoides\* egg inactivation by free ammonia treatment of ash-amended UDDT vault products using stored urine in Uganda](#). *Journal of Water Sanitation and Hygiene for Development* **6** (2), 259–268.
- Vinnerås, B., Bjorklund, A. & Jonsson, H. 2003 [Thermal composting of faecal matter as treatment and possible disinfection method – laboratory scale and pilot scale studies](#). *Bioresource Technology* **88** (1), 47–54.
- Vu-Van, T., Pham-Duc, P., Winkler, M. S., Zurbrügg, C., Zinsstag, J., Thanh, H. L. T., Bich, T. H. & Nguyen-Viet, H. 2016 [\*Ascaris lumbricoides\* egg die-off in an experimental excreta storage system and public health implication in Vietnam](#). *International Journal of Public Health* **62** (102), 1–9.
- Wichuk, K. M. & McCartney, D. 2007 [A review of the effectiveness of current time-temperature regulations on pathogen inactivation during composting](#). *Journal of Environmental Engineering and Science* **6** (5), 573–586.
- Yaya-Beas, R. E., Cadillo-La-Torre, E. A., Kujawa-Roeleveld, K., van Lier, J. B. & Zeeman, G. 2016 [Presence of helminth eggs in domestic wastewater and its removal at low temperature UASB reactors in Peruvian highlands](#). *Water Research* **90**, 286–293.
